# Supplementary material for: A High Flux Electrochemical Filtration System Based on Electrospun Carbon Nanofiber Membrane for Efficient Tetracycline Degradation
Source: MDPI journal article supplement (doi:10.3390/w14060910), 2022-03-15
Supplement: s1 [file s1]

Archive with 1 entries (1 files):
- water-1604358-supplementary.pdf
