# Supplementary material for: A High Flux Electrochemical Filtration System Based on Electrospun Carbon Nanofiber Membrane for Efficient Tetracycline Degradation
Source: MDPI journal article supplement (doi:10.3390/w14060910), 2022-03-15
Supplement: s1 [file s1 › water-1604358-supplementary.pdf]

# A High Flux Electrochemical Filtration System Based on Electrospun Carbon Nanofiber Membrane for Efficient Tetracycline Degradation

Xue Yang <sup>1,2</sup>, Xian Li <sup>1,2</sup>, Yongyou Hu <sup>1,2,\*</sup>, Jianhua Cheng <sup>1</sup> and Yuancai Chen <sup>1</sup>

## Text S1. Materials and reagents

Polyacrylonitrile (PAN, Mw 150,000), N, N-dimethylformamide (DMF), oxalic acid (OA) were purchased from MackLin (Shanghai, China). Terephthalic acid (PTA) and tetracycline (TC) were acquired from Aladdin (Shanghai, China). Anhydrous sodium sulfate ( $\text{Na}_2\text{SO}_4$ ) were obtained from Damao Chemical Reagent Co., Ltd (Tianjin, China). Sulfuric acid ( $\text{H}_2\text{SO}_4$ ), sodium hydroxide (NaOH), ethanol (EtOH) and tert-butyl-alcohol (TBA) were purchased from Guangzhou Chemical Reagent (China). Unless otherwise stated, the reagents used were analytical grade without further purification.

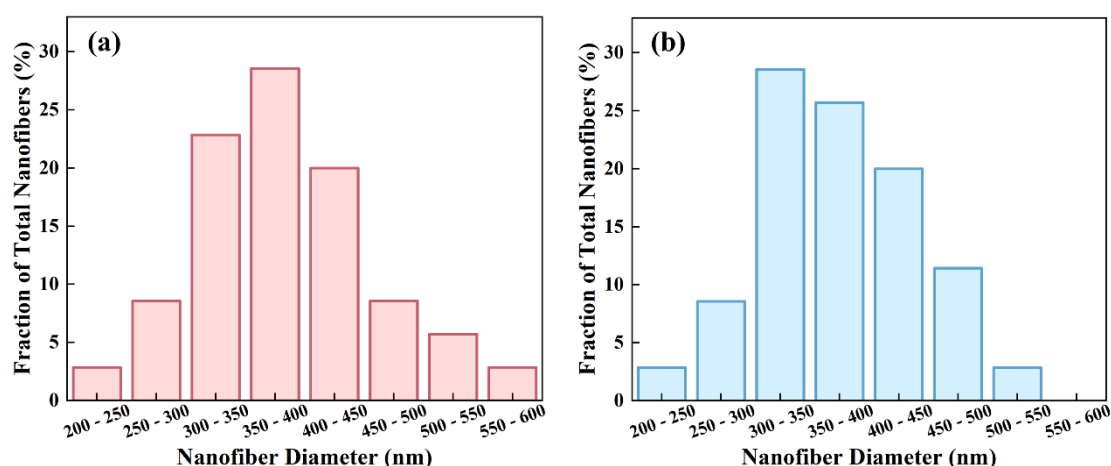

**Figure S1.** Histograms of nanofiber diameter of (a) electrospun nanofibers (2.5 wt% PTA) and (b) carbonized nanofibers (ECNFM-2.5%-1000).

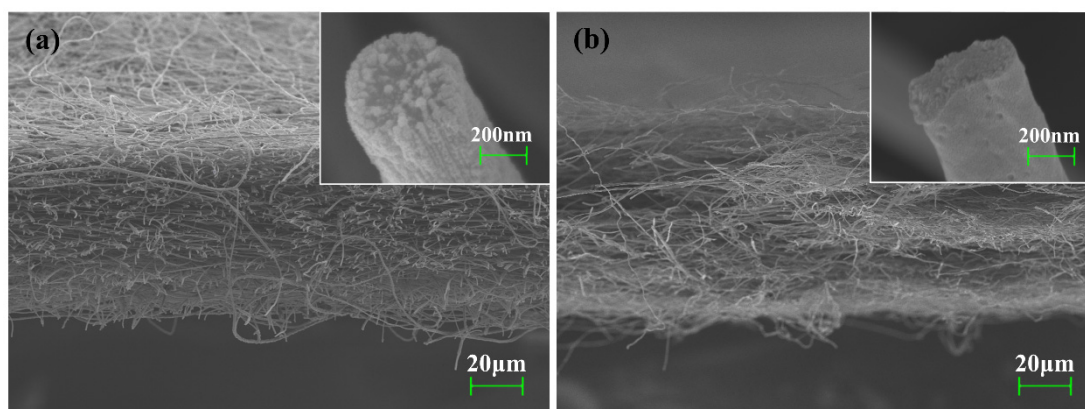

**Figure S2.** Cross-sectional images of (a) electrospun nanofibers (2.5 wt% PTA) and (b) carbonized nanofibers (ECNFM-2.5%-1000).

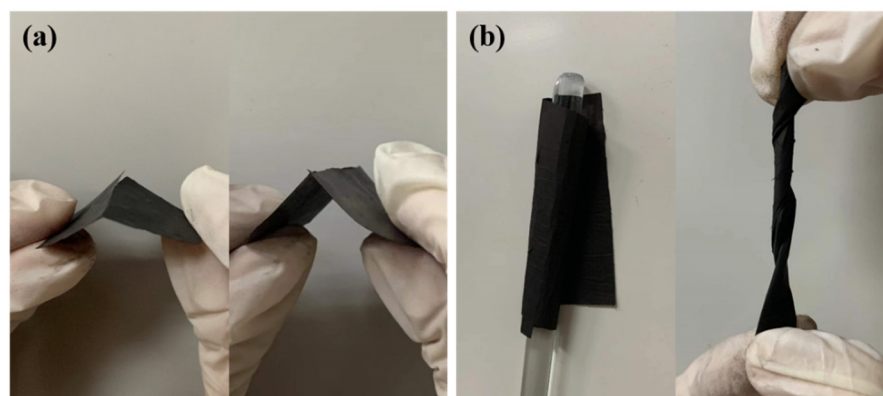

**Figure S3.** Photographs of (a) ECNFM and (b) ECNFM-2.5%-1000.

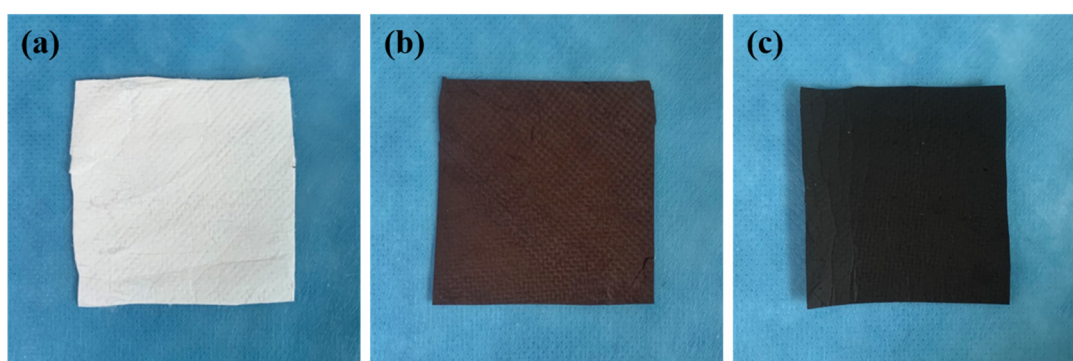

**Figure S4.** Photographs of (a) electrospun, (b) stabilized, (c) carbonized nanofiber membrane.

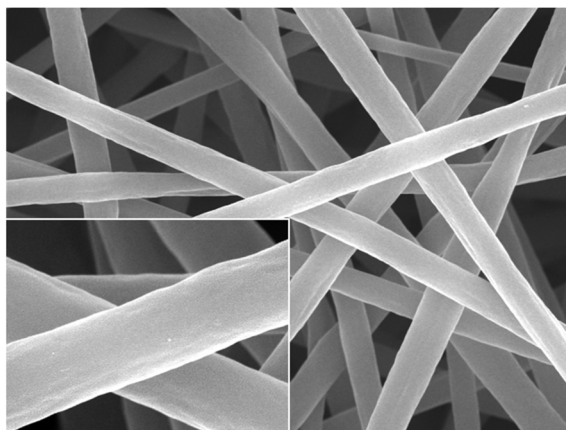

**Figure S5.** SEM images of ECNFM-2.5%-1000 after 8-h continuous operation.

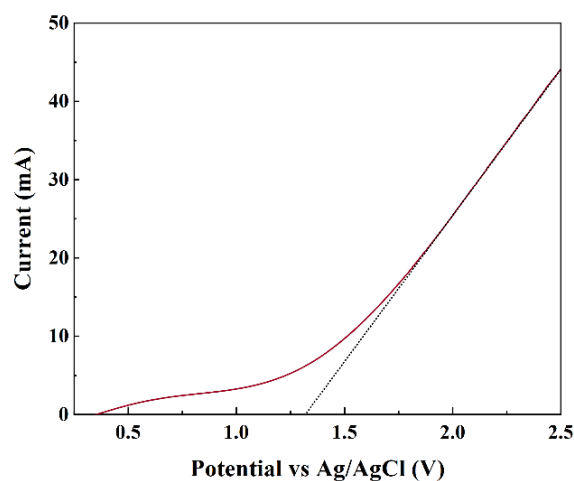

Figure S6. Linear sweep voltammetry (LSV) curve.

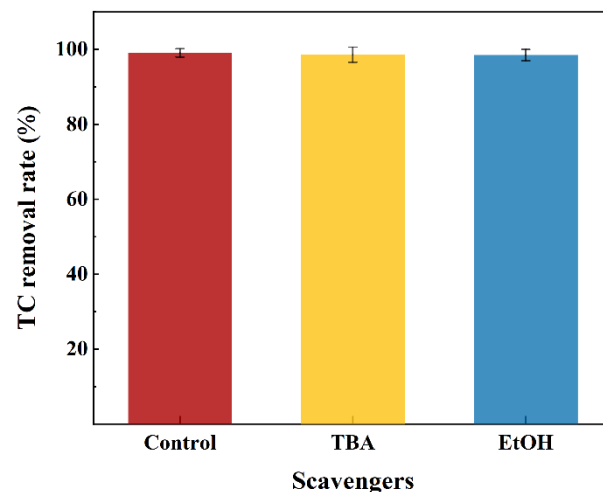

Figure S7. Effect of scavengers on TC removal rate. Experimental conditions: voltage = 2 V, natural pH = 6.1,  $[\text{Na}_2\text{SO}_4] = 0.1 \text{ mol L}^{-1}$ ,  $[\text{TC}] = 10 \text{ ppm}$ .

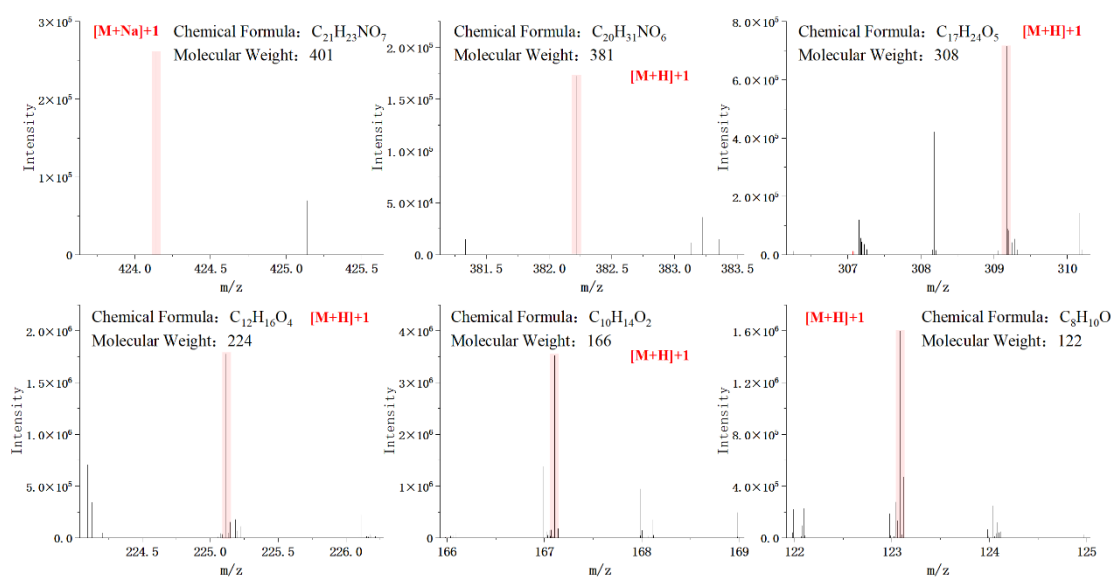

Figure S8. Secondary MS spectra of TC and the possible identified intermediates.

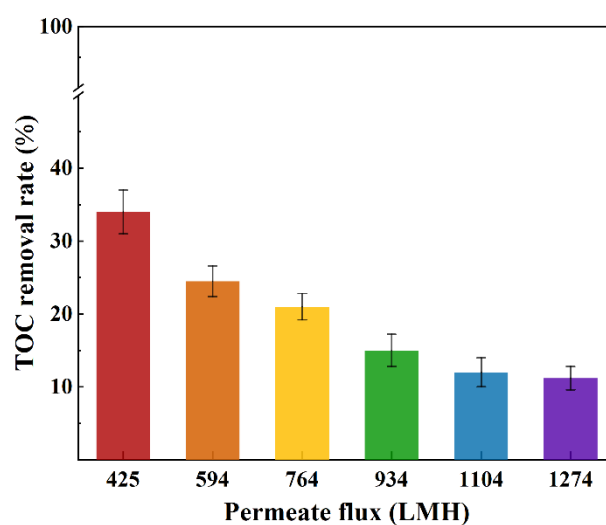

**Figure S9.** TOC measurement as a function of permeate flux. Experimental conditions: voltage = 2 V, natural pH = 6.1,  $[\text{Na}_2\text{SO}_4] = 0.1 \text{ mol L}^{-1}$ ,  $[\text{TC}] = 10 \text{ ppm}$ .

**Table S1.** Characteristics of ECNFM.

| Materials       | Mean pore diameter ( $\mu\text{m}$ ) | Porosity (%) | Permeation Flux ( $\text{L m}^{-2} \text{ h}^{-1} \text{ bar}^{-1}$ ) |
|-----------------|--------------------------------------|--------------|-----------------------------------------------------------------------|
| ECNFM-0-1000    | 1.07                                 | 80.0         | $7.66 \times 10^4$                                                    |
| ECNFM-2.5%-1000 | 2.52                                 | 92.8         | $1.15 \times 10^5$                                                    |

**Table S2.** Performance comparison of ECNFM-based electrochemical filter with other electrochemical filtration system.

| Anode (Working electrode)                                    | Pollutant                                                                          | Current density ( $\text{mA cm}^{-2}$ )/ Potential (V) | Permeate flux ( $\text{L h}^{-1} \text{ m}^{-2}$ ) | Removal rate (%) | Energy consumption ( $\text{kWh m}^{-3}$ ) |
|--------------------------------------------------------------|------------------------------------------------------------------------------------|--------------------------------------------------------|----------------------------------------------------|------------------|--------------------------------------------|
| CNT/PTFE filter                                              | Tetracycline (0.2mM)                                                               | 1.5 V                                                  | 127.48                                             | >95              | 0.084                                      |
| Bi-doped $\text{SnO}_2$ -loaded $\text{TiO}_{2n-1}$ membrane | Atrazine (10 $\mu\text{M}$ )<br>Clothianidin (10 $\mu\text{M}$ )<br>Phenol (10ppm) | 3.5 V                                                  | 600                                                | >99.9            | <0.42<br>0.83                              |
| Porous carbon membrane                                       | Methyl orange (10ppm)                                                              | 2.0 V<br>1.0 V                                         | 74.6                                               | 90<br>100        | -                                          |
| $\text{Ti}_4\text{O}_7$ reactive electrochemical membranes   | Sulfamethoxazole (100 $\mu\text{M}$ )                                              | 2.03 V                                                 | 300                                                | ~95.7            | -                                          |
| PANI-CNT membrane                                            | Methylene Blue (5ppm)                                                              | 3.0 V                                                  | 70                                                 | 84.1             | -                                          |
| Bi- $\text{SnO}_2$ -coated CNT membrane                      | Bisphenol A (30ppm)                                                                | 3.0 V                                                  | 170                                                | 76.80            | -                                          |
| Coal-based carbon membrane                                   | Bisphenol A (50ppm)                                                                | 2.0 V                                                  | 43.7                                               | 97               | -                                          |

|                                                                      |                                       |                         |      |      |          |
|----------------------------------------------------------------------|---------------------------------------|-------------------------|------|------|----------|
| RuO <sub>2</sub> /TiO <sub>2</sub> nanorods-loaded Carbon nanofibers | Methyl blue (200ppm)                  | 1.0 mA cm <sup>-2</sup> | 360  | 99.9 | -        |
|                                                                      | Bisphenol A (0.5ppm)                  |                         |      | 98   |          |
|                                                                      | Sulfadiazine (0.5ppm)                 |                         |      | 98   |          |
| TiO <sub>2</sub> @SnO <sub>2</sub> -Sb                               | p-chloroaniline (10um)                | 3.0 V                   | 17.4 | 85.5 | 0.38     |
| Sb-SnO <sub>2</sub> -coated carbon membrane                          | Tetracycline (50ppm)                  | 3.0 V                   | 150  | 99.3 | -        |
| RuO <sub>2</sub> -coated Ti mesh                                     | p-chloroaniline (50um)                | 2.0 V                   | 17   | 91   | 1.09     |
| Molecular imprinting TiO <sub>2</sub> @SnO <sub>2</sub> -Sb          | 2,4-dichlorophenoxyacetic acid (1ppm) | 3.0 V                   | 17   | 62.4 | 0.58     |
| Ti/SnO <sub>2</sub> -Sb/Ce-PbO <sub>2</sub>                          | Benzophenone-3 (10ppm)                | 25 mA cm <sup>-2</sup>  | -    | 91.6 | 3.3–62.1 |
|                                                                      | 4-hydroxybenzophenone (10ppm)         |                         |      | 96.5 | 3.6–79.5 |

Table S3. The information of the possible intermediate products.

| Compounds | Formula                                                       | m/z | Proposed structure                                                                    |
|-----------|---------------------------------------------------------------|-----|---------------------------------------------------------------------------------------|
| TC        | C <sub>22</sub> H <sub>24</sub> N <sub>2</sub> O <sub>8</sub> | 444 | 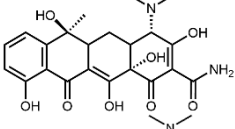 |
| A         | C <sub>21</sub> H <sub>23</sub> NO <sub>7</sub>               | 401 | 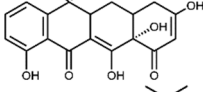 |
| B         | C <sub>20</sub> H <sub>31</sub> NO <sub>6</sub>               | 381 | 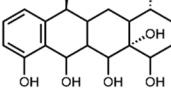 |
| C         | C <sub>17</sub> H <sub>24</sub> O <sub>5</sub>                | 308 | 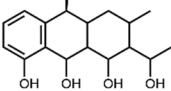 |
| D         | C <sub>12</sub> H <sub>16</sub> O <sub>4</sub>                | 224 | 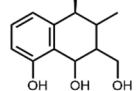 |
| E         | C <sub>10</sub> H <sub>14</sub> O <sub>2</sub>                | 166 | 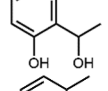 |
| F         | C <sub>8</sub> H <sub>10</sub> O                              | 122 | 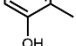 |
